# Supplementary material for: An emerging aerosol climatology via remote sensing over Metro Manila, the Philippines
Source: Copernicus journal article supplement (doi:10.5194/acp-23-10579-2023), 2023-09-26
Supplement: Supplementary file 1 [file acp-23-10579-2023-supplement.pdf]

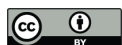

*Supplement of*

## **An emerging aerosol climatology via remote sensing over Metro Manila, the Philippines**

**Genevieve Rose Lorenzo et al.**

*Correspondence to:* Armin Sorooshian ([armin@arizona.edu](mailto:armin@arizona.edu))

The copyright of individual parts of the supplement might differ from the article licence.

1 Table S1: Median aerosol properties associated with the AERONET volume size distribution (VSD) data for the total, fine, and coarse  
2 fractions from January 2009 to October 2018. The time frames indicate the data included in the summary statistics, where ALL means  
3 all the 1419 data points with VSD data. DJF, MAM, JJA, and SON indicate the summary statistics for specific consecutive months for  
4 all the years (where DJF is December, January, and February). AM and PM are the summary statistics for data collected during the  
5 morning (AM) or afternoon (PM) local times for the entire period. The volume concentration ( $C_v$ ) has units of  $\mu\text{m}^3 \mu\text{m}^{-2}$ . The  
6 following parameters have units of  $\mu\text{m}$ : radius at peak volume concentration ( $r_{\text{peak}}$ ), effective radius ( $r_{\text{eff}}$ ), volume mean radius ( $r_v$ ), and  
7 standard deviation ( $\sigma$ ).

| Time Frame | AOD    | $C_v$  | FMF    | Fine   |        |                   |                  |        |          | Coarse |        |                   |                  |        |          |
|------------|--------|--------|--------|--------|--------|-------------------|------------------|--------|----------|--------|--------|-------------------|------------------|--------|----------|
|            |        |        |        | AOD    | $C_v$  | $r_{\text{peak}}$ | $r_{\text{eff}}$ | $r_v$  | $\sigma$ | AOD    | $C_v$  | $r_{\text{peak}}$ | $r_{\text{eff}}$ | $r_v$  | $\sigma$ |
| ALL        | 0.1674 | 0.0610 | 0.6514 | 0.1086 | 0.0220 | 0.1482            | 0.1450           | 0.1630 | 0.4890   | 0.0524 | 0.0360 | 3.8575            | 1.9690           | 2.6410 | 0.7330   |
| DJF        | 0.1507 | 0.0590 | 0.6215 | 0.0907 | 0.0190 | 0.1482            | 0.1475           | 0.1640 | 0.4960   | 0.0557 | 0.0390 | 3.8575            | 2.0410           | 2.7300 | 0.7335   |
| MAM        | 0.1791 | 0.0630 | 0.6774 | 0.1240 | 0.0235 | 0.1482            | 0.1430           | 0.1600 | 0.4820   | 0.0522 | 0.0360 | 3.8575            | 1.9435           | 2.5995 | 0.7330   |
| JJA        | 0.1708 | 0.0520 | 0.7700 | 0.1400 | 0.0310 | 0.1482            | 0.1460           | 0.1670 | 0.5080   | 0.0360 | 0.0220 | 2.9400            | 2.1680           | 2.7520 | 0.6670   |
| SON        | 0.1479 | 0.0575 | 0.5733 | 0.0869 | 0.0170 | 0.1482            | 0.1480           | 0.1665 | 0.5035   | 0.0570 | 0.0370 | 2.9400            | 1.9290           | 2.5640 | 0.7505   |
| AM         | 0.1654 | 0.0600 | 0.6443 | 0.1067 | 0.0210 | 0.1482            | 0.1460           | 0.1640 | 0.4950   | 0.0518 | 0.0350 | 3.8575            | 1.9494           | 2.5925 | 0.7360   |
| PM         | 0.1850 | 0.0575 | 0.6847 | 0.1264 | 0.0260 | 0.1482            | 0.1410           | 0.1550 | 0.4590   | 0.0555 | 0.0390 | 3.8575            | 2.2070           | 2.8850 | 0.7190   |

8

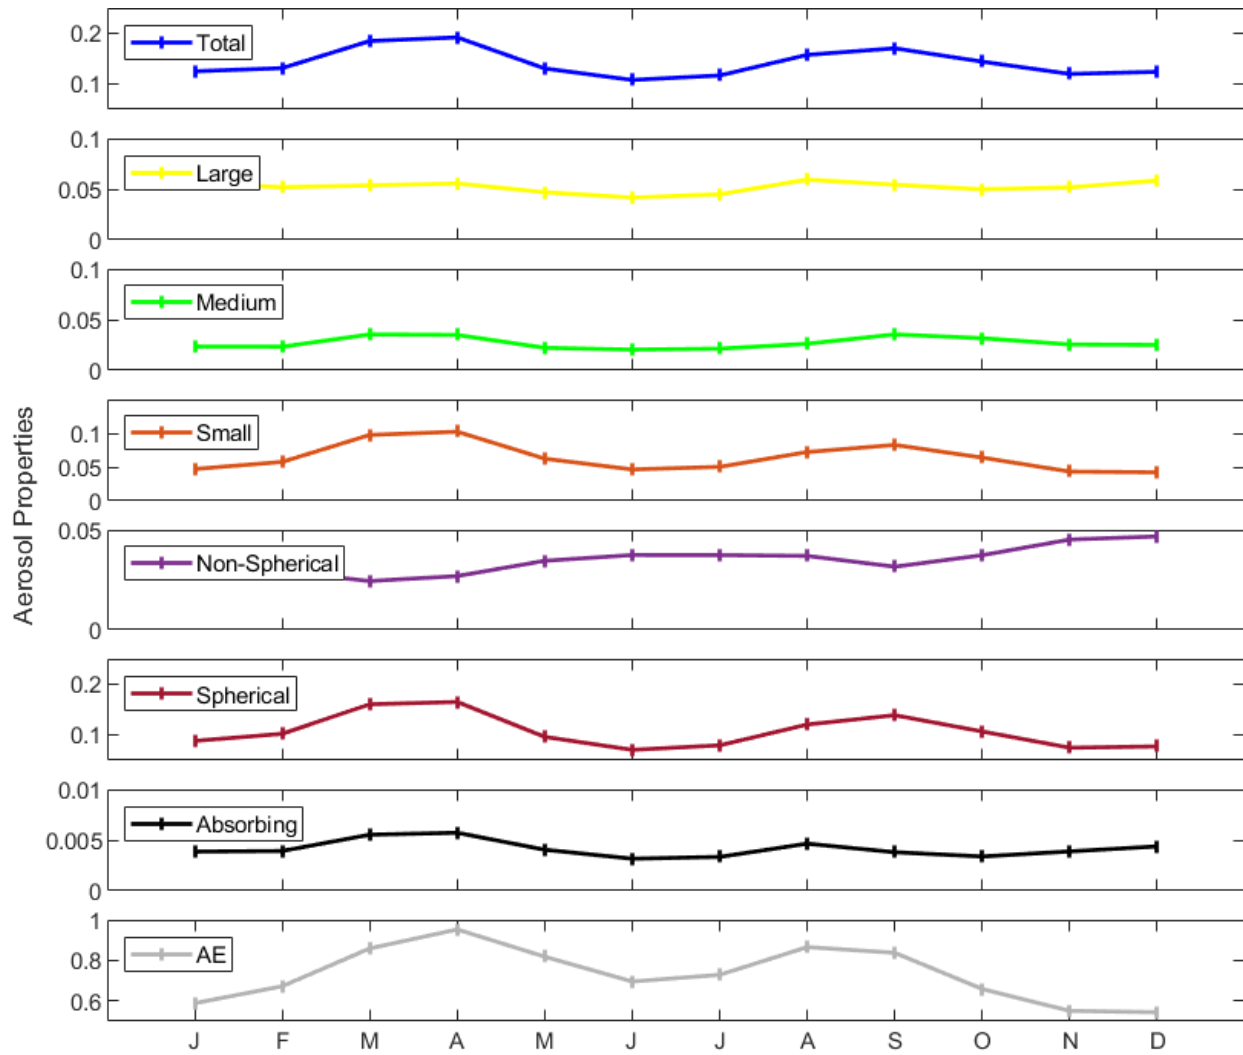

9

10 **Figure S1:** MISR monthly mean time series of 550 nm AOD (total, large (particle radii > 0.7  
 11  $\mu\text{m}$ ), medium (particle radii from 0.35 to 0.7  $\mu\text{m}$ ), small (particle radii < 0.35  $\mu\text{m}$ ), non-spherical  
 12 spherical, and absorption optical depth) and angstrom exponent (AE) for March 2000 to  
 13 December 2020 for 116.5°E - 128.5°E; 6.5°N - 22.5°N.

14

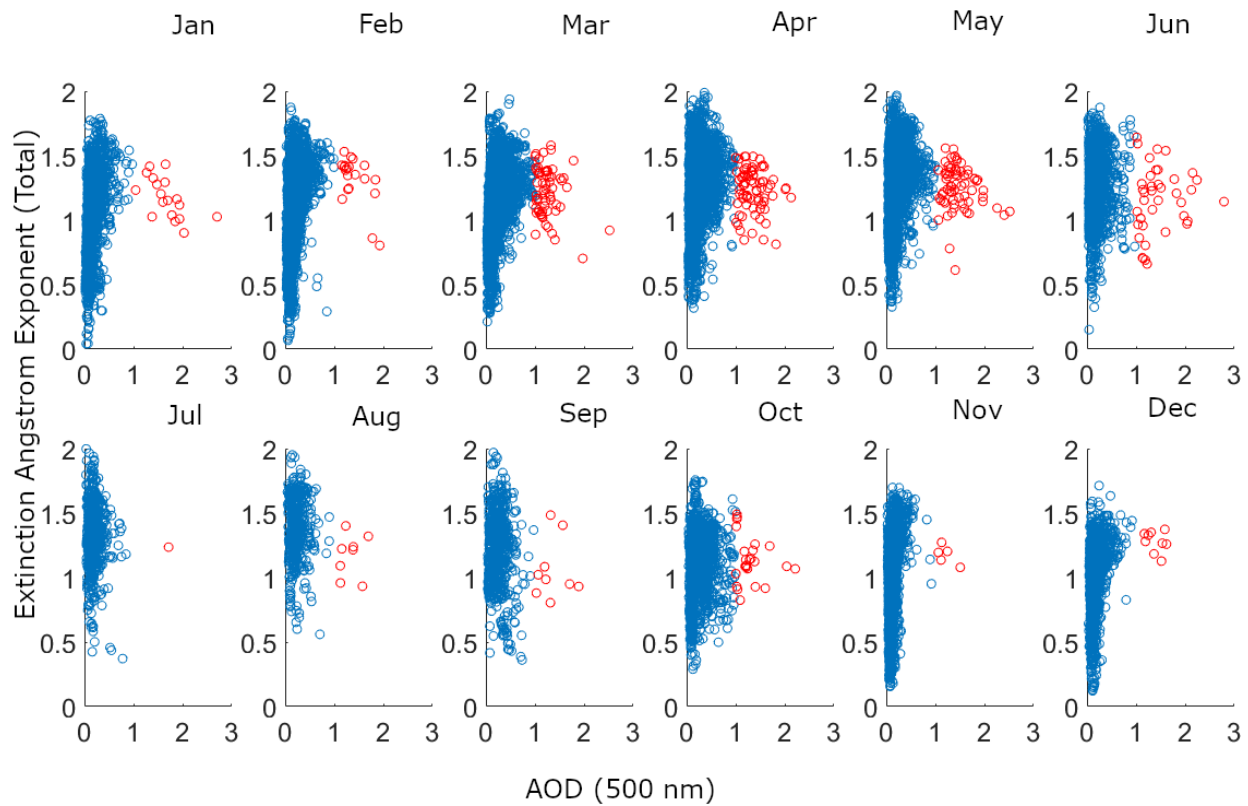

15

16 **Figure S2:** Scatterplots of total extinction angstrom exponent (EAE) versus AOD (500 nm). The  
 17 red circles indicate when AOD exceeded 1.

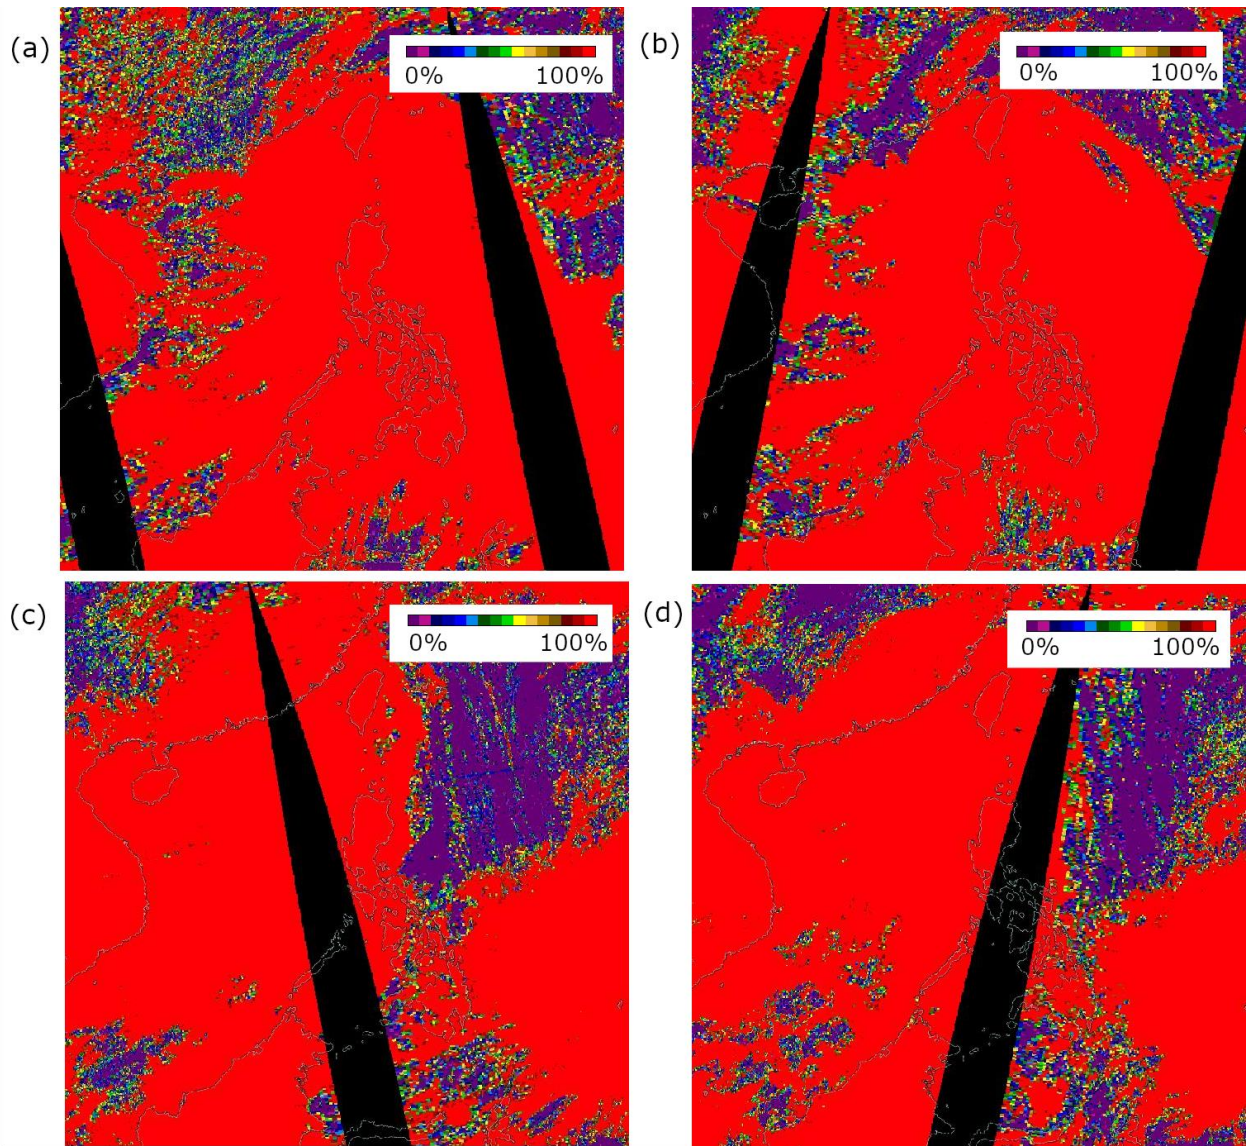

18

19 **Figure S3:** Cloud fraction images from (a/c) Aqua / MODIS and (b/d) Terra / MODIS satellite  
20 products. These are day-time snapshots during the back-trajectory periods: (a/b) 24 August 2009  
21 at 00:00 UTC and (c/d) 25 August 2009 at 00:00 UTC. Red areas in panels show where there is  
22 100% cloud fraction.

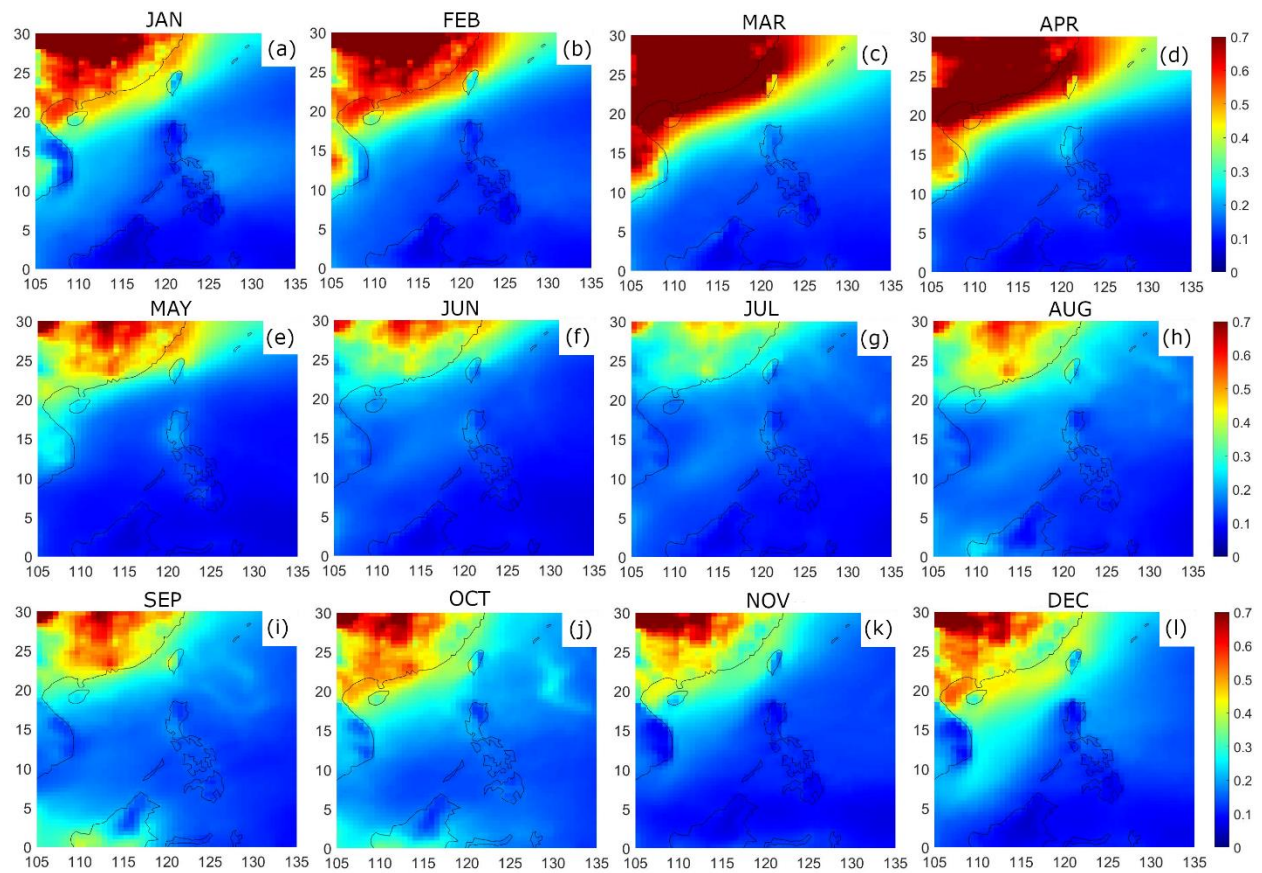

23  
24  
25

**Figure S4:** Monthly mean MERRA-2 AOD (extinction at 550 nm) from 2009 to 2018 in Southeast Asia.



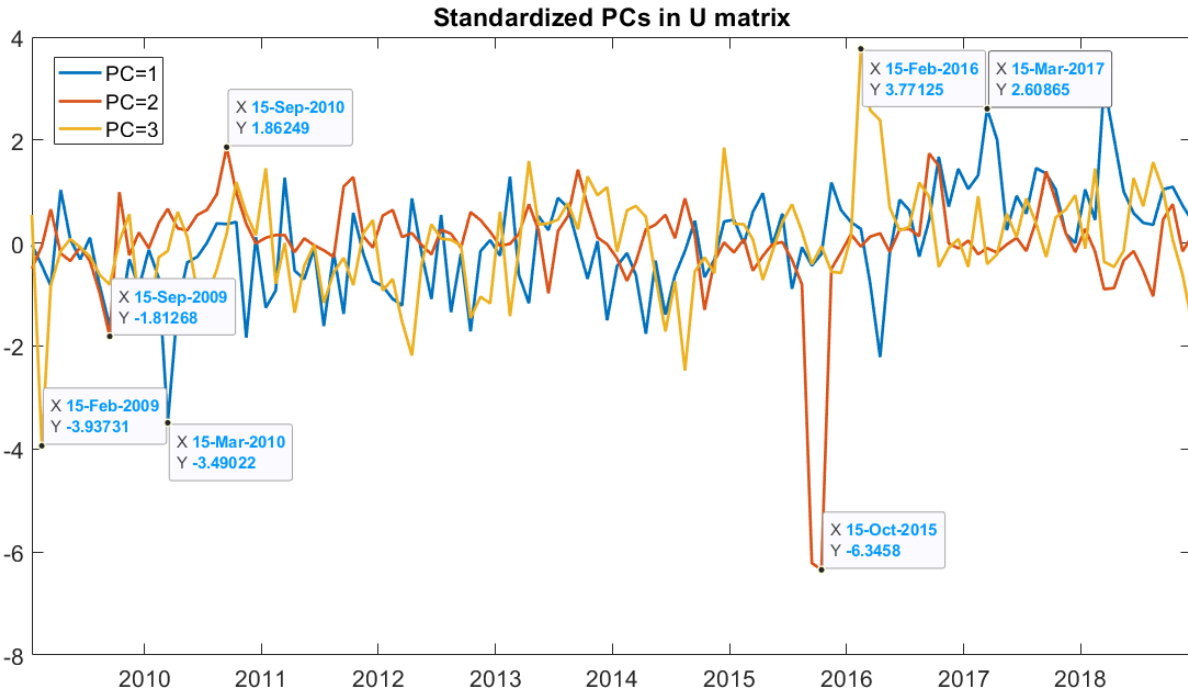

26  
27  
28

**Figure S5:** Time series of standardized principal components. Maximum and minimum values per principal component are annotated with the month of occurrence.
